# Supplementary material for: Evaluating inhaler technique, patient preferences and opportunities for improvement in hospitals in the UK
Source: PubMed Central journal article supplement — Future Healthc J. 2024 May 11;11(2):100141. doi: 10.1016/j.fhj.2024.100141 (PMC11153909; doi:10.1016/j.fhj.2024.100141), 2024-05-11
Supplement: mmc1.pdf [file mmc1.pdf]

## Inhaler Audit Pro-forma

*\*Before starting the questionnaire, check with a nurse or another health professional who knows the patient whether he/she/they considers that the patient has capacity to answer these questions.*

*Also, before starting to complete the questionnaire, check with the patient whether they are happy to take part and whether this is a convenient time for them or they would like you to return later.*

|      |  |                                           |  |
|------|--|-------------------------------------------|--|
| Date |  | Location<br>(Ward & Hospital)             |  |
| MRN  |  | Confirmed that the patient has capacity * |  |

*What is the patient's condition?*

| <i>Asthma</i> | <i>COPD</i> | <i>Other? If so, please write below</i> |
|---------------|-------------|-----------------------------------------|
| <i>Y/N</i>    | <i>Y/N</i>  | <i>Y/N .....</i>                        |

### Prescribed inhalers

1) Can I check which inhalers you are on?

| Inhalers that the patient is prescribed in primary care (according to summary care record or patient notes) | Inhalers that the patient is prescribed for this admission (according to inpatient script) | Inhalers at patient's bedside (and number of each type) |
|-------------------------------------------------------------------------------------------------------------|--------------------------------------------------------------------------------------------|---------------------------------------------------------|
|                                                                                                             |                                                                                            |                                                         |

**Inhaler technique (DPI) – hold up relevant inhaler**

2) How confident are you with your inhaler technique for this inhaler? (DPI)

| Very confident | Confident | Somewhat confident | Not at all confident |
|----------------|-----------|--------------------|----------------------|
|                |           |                    |                      |

3) Has a healthcare professional demonstrated good inhaler technique for this inhaler to you before? If so, was that in the last one month, the last one year, or longer ago? (DPI)

| Yes, <1 month ago | Yes, 1m-12m ago | Yes, >1 year ago | No, never | Unsure |
|-------------------|-----------------|------------------|-----------|--------|
|                   |                 |                  |           |        |

4) Please demonstrate your inhaler technique. (DPI)

|                                                                              | Demonstrated correctly | <b>Not</b> demonstrated correctly |
|------------------------------------------------------------------------------|------------------------|-----------------------------------|
| Prepare the inhaler (as per inhaler, e.g. shake inhaler, remove mouth piece) |                        |                                   |
| Empty lungs                                                                  |                        |                                   |
| Positioning (sat up straight, chin inclined up)                              |                        |                                   |
| Mouth seal                                                                   |                        |                                   |
| Fast, deep inhalation                                                        |                        |                                   |
| Hold breath for 3 seconds                                                    |                        |                                   |

5) **This question is optional:** After you complete this review of inhaler technique, you may have the facilities and time available to check whether the patient's inspiratory effort is sufficient to effectively use a DPI. If so, please answer these questions:

a. Which device was used to check inspiratory effort?

| Incheck device | Trainhaler / Placebo inhaler device | Other? Please give name |
|----------------|-------------------------------------|-------------------------|
| Y/N            | Y/N                                 | Y/N .....               |

b. Was the patient's inspiratory effort sufficient to use a DPI?

| Yes | No |
|-----|----|
|     |    |

**Replacement (DPI)**

6) Do you know when this inhaler needs replacing? (DPI)

| Yes | No |
|-----|----|
|     |    |

If yes, how do you know when it needs replacing? (DPI)

7) Do you get a new one of these inhalers automatically on your repeat prescription, or do you have to request a new inhaler when yours is nearly empty? (DPI)

| Automatically | Request when required | Unsure |
|---------------|-----------------------|--------|
|               |                       |        |

➔ **If the patient also takes an MDI then complete Q8 to 13. If not, then skip to Q14.**

➔ **If the patient is on a soft mist inhaler (SMI) please also complete the SMI supplementary questions (Appendix, Q18-24) and then return to this part of the proforma.**

**Inhaler technique (MDI) – hold up relevant inhaler**

8) How confident are you with your inhaler technique for this inhaler? (MDI)

|                |           |                    |                      |
|----------------|-----------|--------------------|----------------------|
| Very confident | Confident | Somewhat confident | Not at all confident |
|                |           |                    |                      |

9) Has a healthcare professional demonstrated good inhaler technique for this inhaler to you before? If so, was that in the last one month, the last one year, or longer ago? (MDI)

|                   |                 |                  |           |        |
|-------------------|-----------------|------------------|-----------|--------|
| Yes, <1 month ago | Yes, 1m-12m ago | Yes, >1 year ago | No, never | Unsure |
|                   |                 |                  |           |        |

10) Please demonstrate your inhaler technique (MDI)

|                                                                                        | Demonstrated correctly | <b>Not</b> demonstrated correctly |
|----------------------------------------------------------------------------------------|------------------------|-----------------------------------|
| Prepare inhaler e.g. remove mouthpiece, attach spacer                                  |                        |                                   |
| Empty lungs                                                                            |                        |                                   |
| Positioning (sat up straight, chin inclined up)                                        |                        |                                   |
| Mouth seal                                                                             |                        |                                   |
| Appropriate inhalation – slow and gentle if no spacer / five tidal breaths with spacer |                        |                                   |

11) Are you prescribed this inhaler for more than one dose at a time, e.g. ‘two puffs once a day’ or ‘two puffs twice a day’? (MDI)

*If the patient answers yes to this question, please ask them to demonstrate how they take the second dose. An appropriate technique for taking a second dose is to complete the first dose and then repeat the steps above. Some patients may already have demonstrated inappropriate technique, e.g. by spraying two doses into a spacer at once.*

|                                      |                                                                                |                                                                                  |
|--------------------------------------|--------------------------------------------------------------------------------|----------------------------------------------------------------------------------|
| Not prescribed two puffs at one time | Prescribed two puffs at one time and demonstrated <b>appropriate</b> technique | Prescribed two puffs at one time and demonstrated <b>inappropriate</b> technique |
|                                      |                                                                                |                                                                                  |

**Replacement (MDI)**

12) Do you know when this inhaler needs replacing? (MDI)

| Yes | No |
|-----|----|
|     |    |

If yes, how do you know when it needs replacing? (MDI)

|  |
|--|
|  |
|--|

13) Do you get a new one of this inhaler automatically on your repeat prescription, or do you have to request a new inhaler when yours is nearly empty? (MDI)

| Automatically | Request when required | Unsure |
|---------------|-----------------------|--------|
|               |                       |        |

**Questions about all inhalers, to complete with all patients**

14) How do you most frequently dispose of your inhalers?

*In order not to bias the response, please ask the question above and document which of the following they reply. If the patient has variable approach to disposing of their inhaler, ask them to describe the most common method.*

| Household waste bin | Recycling bin | Return to pharmacy | Other – please write the patient’s response here in free text |
|---------------------|---------------|--------------------|---------------------------------------------------------------|
|                     |               |                    |                                                               |

15) Did you know that your used inhalers cannot be recycled in the local council recycling bin?

| Yes | No |
|-----|----|
|     |    |

**Inhaler Preference questions as per NICE asthma decision aid:**

16) How important to you is:

a. Being able to use your inhaler correctly and easily

|                |           |                    |               |
|----------------|-----------|--------------------|---------------|
| Very important | Important | Somewhat important | Not important |
|                |           |                    |               |

b. Being able to tell how many doses are left in your inhaler

|                |           |                    |               |
|----------------|-----------|--------------------|---------------|
| Very important | Important | Somewhat important | Not important |
|                |           |                    |               |

c. Having to clean your spacer frequently

|                |           |                    |               |                |
|----------------|-----------|--------------------|---------------|----------------|
| Very important | Important | Somewhat important | Not important | Not applicable |
|                |           |                    |               |                |

d. Being able to carry your inhaler (and your spacer, if applicable) around with you easily

|                |           |                    |               |
|----------------|-----------|--------------------|---------------|
| Very important | Important | Somewhat important | Not important |
|                |           |                    |               |

e. That your inhaler has a low carbon footprint

|                |           |                    |               |
|----------------|-----------|--------------------|---------------|
| Very important | Important | Somewhat important | Not important |
|                |           |                    |               |

17) Would you consider changing to a different inhaler that has any of the following features?

| Easier to use correctly and easily | Smaller or easier to carry around | Does not require you to use or wash a spacer | Has a lower carbon footprint than your current inhaler | Another reason – please write in free text | I would not change my inhaler by choice |
|------------------------------------|-----------------------------------|----------------------------------------------|--------------------------------------------------------|--------------------------------------------|-----------------------------------------|
| Y / N                              | Y / N                             | Y / N                                        | Y / N                                                  | Y / N                                      | Y / N                                   |

Would you like to say anything more about your answer(s)?

# Appendix: Soft Mist Inhaler (SMI)

## Inhaler technique (SMI) – hold up relevant inhaler

18) How confident are you with your inhaler technique for this inhaler? (SMI)

| Very confident | Confident | Somewhat confident | Not at all confident |
|----------------|-----------|--------------------|----------------------|
|                |           |                    |                      |

19) Has a healthcare professional demonstrated good inhaler technique for this inhaler to you before? If so, was that in the last one month, the last one year, or longer ago? (SMI)

| Yes, <1 month ago | Yes, 1m-12m ago | Yes, >1 year ago | No, never | Unsure |
|-------------------|-----------------|------------------|-----------|--------|
|                   |                 |                  |           |        |

20) Please demonstrate your inhaler technique (SMI)

|                                                                                                                                                                                                                                  | Demonstrated correctly | <b>Not</b> demonstrated correctly |
|----------------------------------------------------------------------------------------------------------------------------------------------------------------------------------------------------------------------------------|------------------------|-----------------------------------|
| Prepare inhaler e.g. <ul style="list-style-type: none"> <li>• Keep cap closed</li> <li>• Turn the clear base in direction of arrows on label until it clicks (1/2 turn)</li> <li>• OPEN cap until it snaps fully open</li> </ul> |                        |                                   |
| Breathe out slowly and fully                                                                                                                                                                                                     |                        |                                   |
| Mouth seal                                                                                                                                                                                                                       |                        |                                   |
| Appropriate inhalation: – PRESS dose -release button during one slow and deep breath inhalation                                                                                                                                  |                        |                                   |
| Hold breathe for 10s or for as long as is comfortable                                                                                                                                                                            |                        |                                   |



21) Are you prescribed this inhaler for more than one dose at a time, e.g. ‘two puffs once a day’? (SMI)

*If the patient answers yes to this question, please ask them to demonstrate how they take the second dose. An appropriate technique for taking a second dose is to complete the first dose and then repeat the steps above. Some patients may already have demonstrated inappropriate technique, e.g. by spraying two doses into a spacer at once.*

| Not prescribed two puffs at one time | Prescribed two puffs at one time and demonstrated <b>appropriate</b> technique | Prescribed two puffs at one time and demonstrated <b>inappropriate</b> technique |
|--------------------------------------|--------------------------------------------------------------------------------|----------------------------------------------------------------------------------|
|                                      |                                                                                |                                                                                  |

**Replacement (SMI)**

22) Do you know when this inhaler needs replacing? (SMI)

| Yes | No |
|-----|----|
|     |    |

If yes, how do you know that it needs replacing? (SMI)

23) Do you get a new one of this inhaler automatically on your repeat prescription, or do you have to request a new inhaler when yours is nearly empty? (SMI)

| Automatically | Request when required | Unsure |
|---------------|-----------------------|--------|
|               |                       |        |

24) (If prescribed SMI) Do you get a whole new inhaler every time? Or do you get a pack of 5 refill cartridges and only a new inhaler every 6 months (minimum)?

| Whole new inhaler every time | Refill pack | Unsure |
|------------------------------|-------------|--------|
|                              |             |        |
